# Supplementary material
Source: PubMed Central journal article supplement (PMC5656044)

Figure 1b

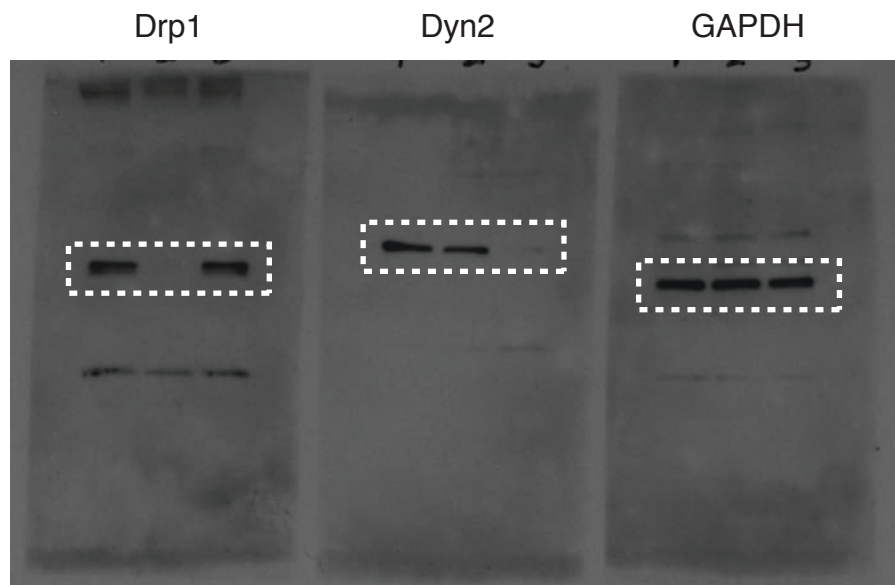

Figure 1e

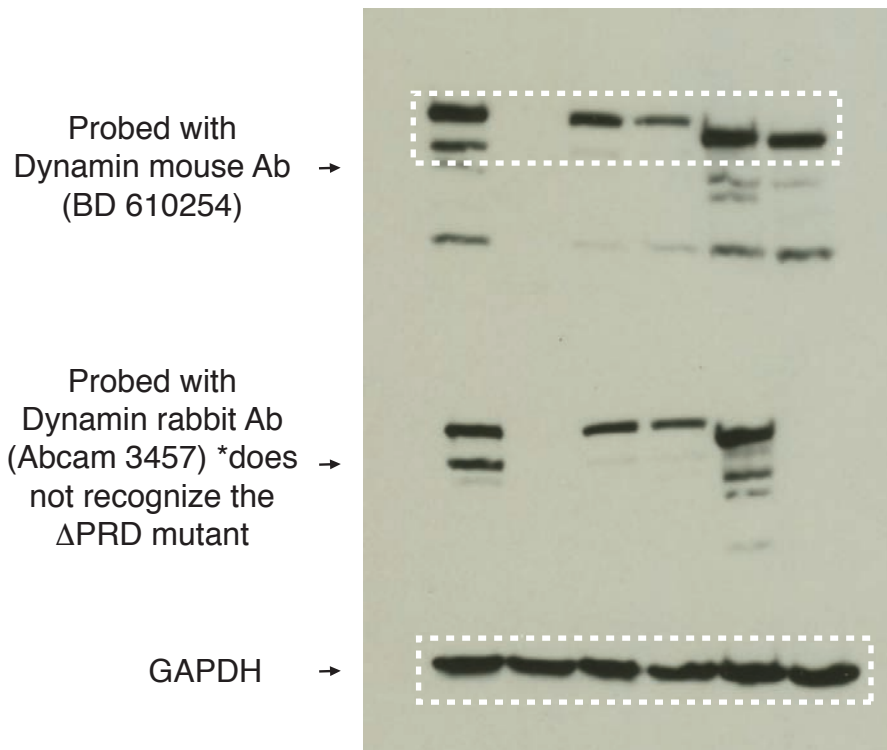

Figure 4d

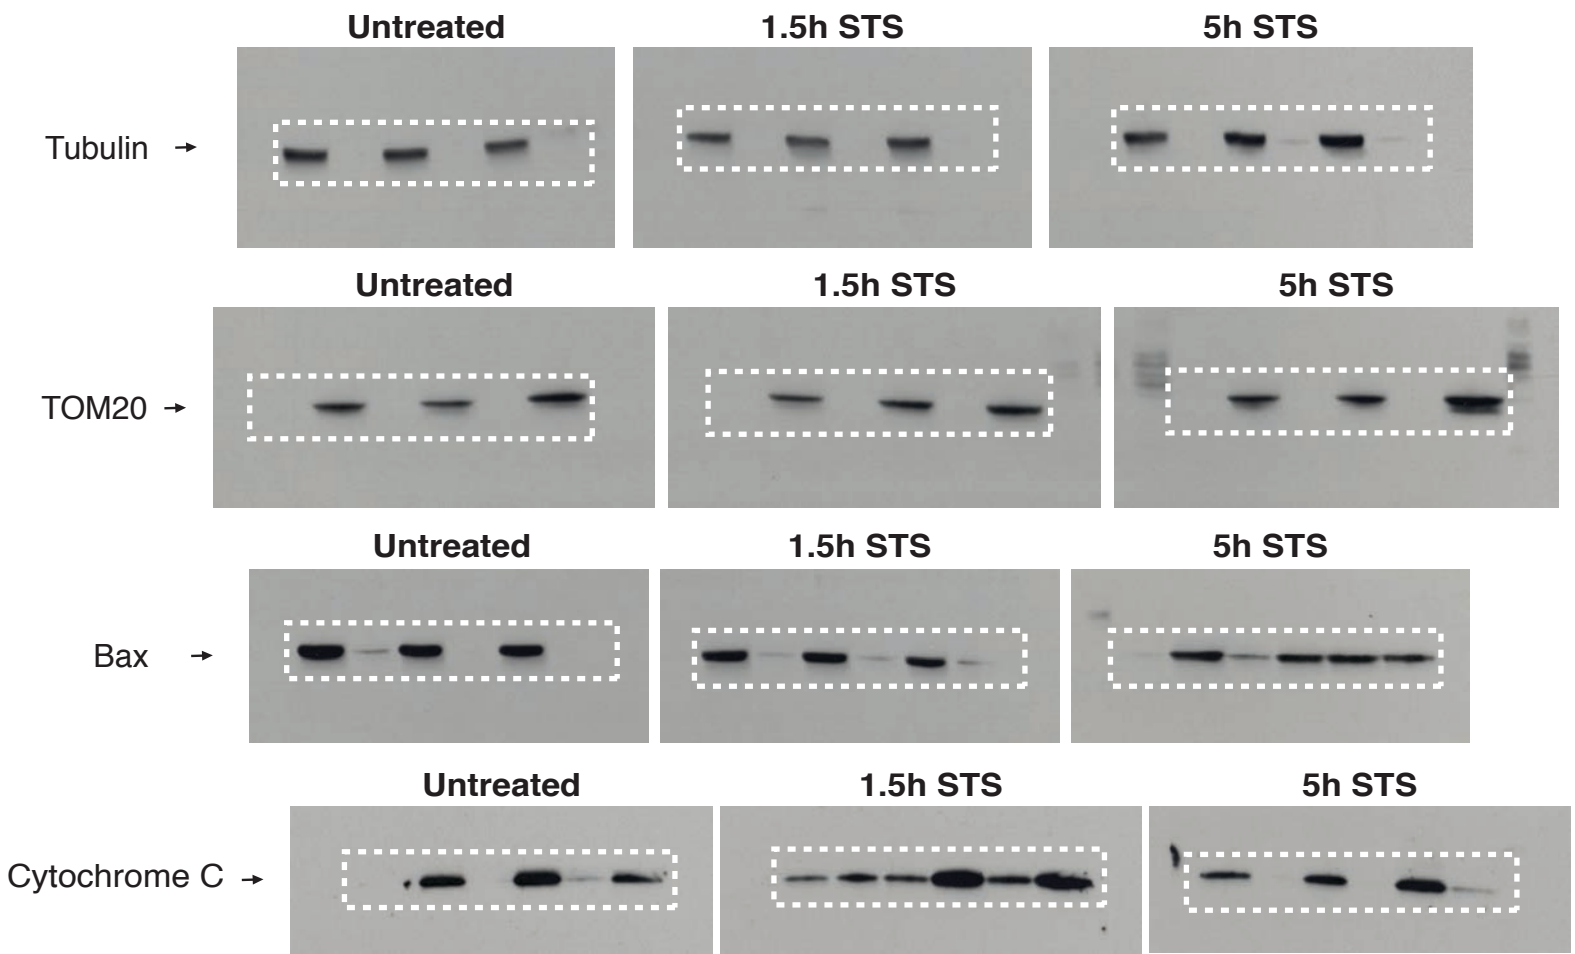

Figure 4e

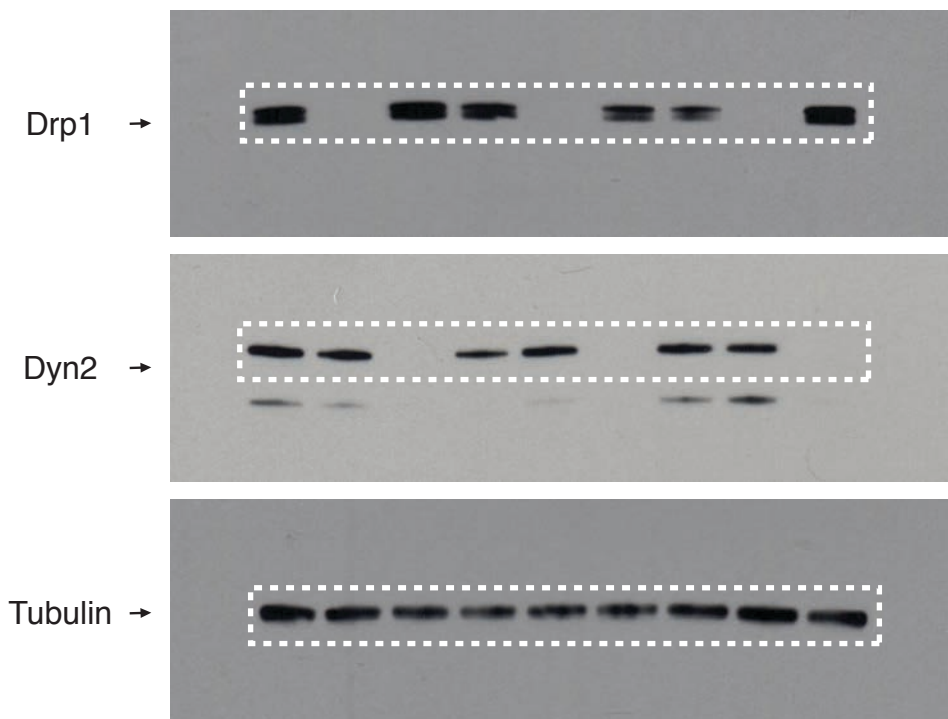

ED Figure 1b

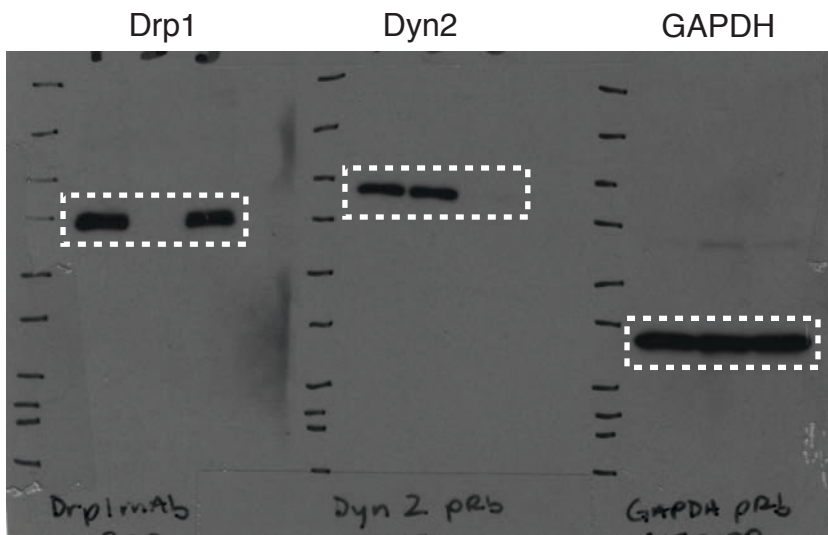

ED Figure 2b

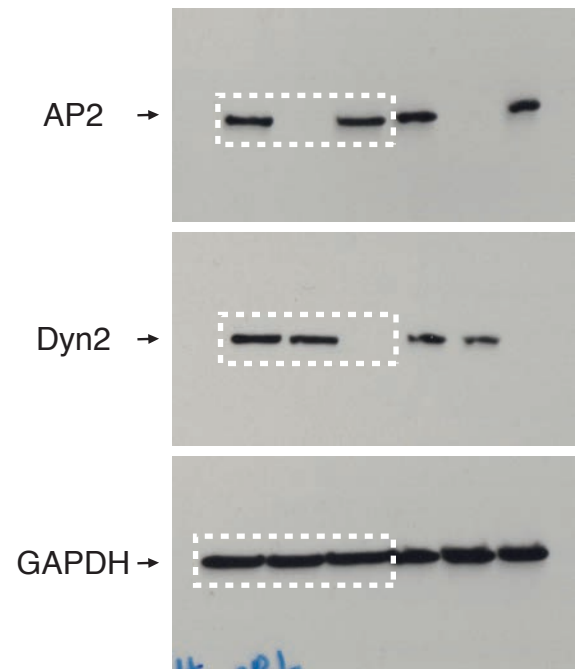

ED Figure 1d

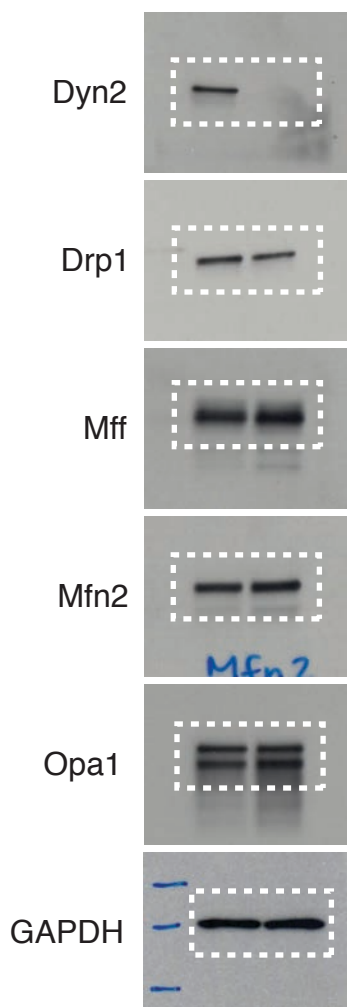

ED Figure 3a

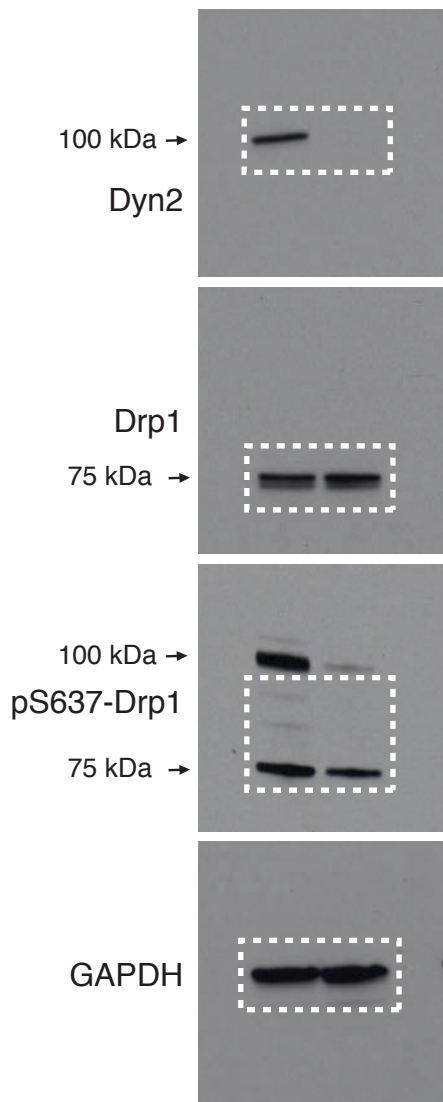

ED Figure 3b

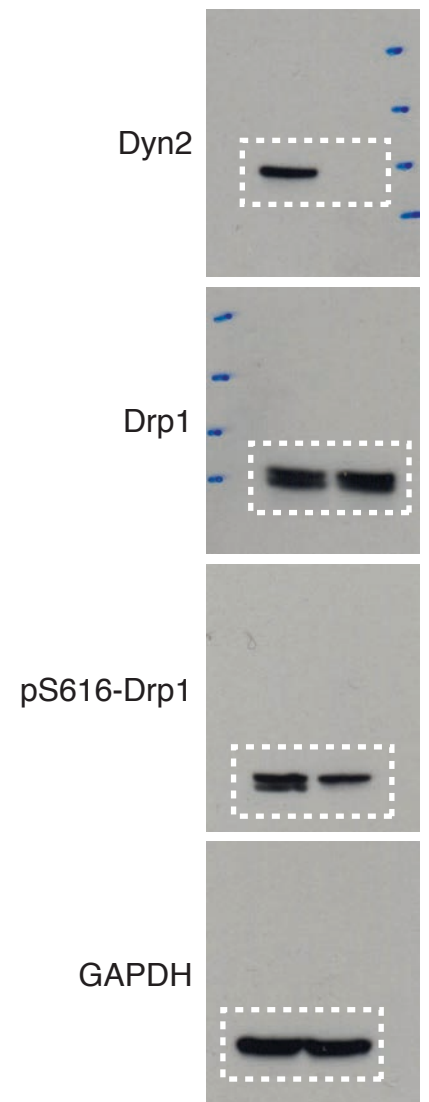

Supplement: NIHMS846111-supplement-supp_info.pdf [file NIHMS846111-supplement-supp_info.pdf]
